# Supplementary material for: Genetic Control of Organ Shape and Tissue Polarity
Source: PLoS Biol. 2010 Nov 9;8(11):e1000537. doi: 10.1371/journal.pbio.1000537 (PMC2976718; doi:10.1371/journal.pbio.1000537)
Supplement: Table S1 — Average sector ellipses by region (relates to Figure 3 ). An Excel table showing the lengths of the major axis (Emaj) and minor axis (Emin) and the orientation (θ) for the average sector ellipse for each region (see Figure S12; θ is given in radians relative to the x-axis) for each stage (300 h, 340 h, 380 h, 420 h, and 460 h). There are two sets of data for the middle stages (340 h, 380 h, and 420 h), corresponding to the optimal grids for the two relevant growth steps. The sheets “Dorsal,” “Lateral,” “”Ventral,” and “Tube” each give the average sector ellipse information for the named petal section. (0.14 MB XLS) [file pbio.1000537.s014.xls]

## Sheet: Dorsal
460h
Region	1	2	3	4	5	6	7	8	9	10	11	12	13	14	15	16	17	18	19	20	21	22	23	24	25	26	27	28	29	30	31	32	33	34	35	36	37	38	39	40	41	42	43	44	45	46	47	48
Emaj	2.26887	2.37418	1.84874	2.09067	2.0464	2.54476	1.79405	1.8164	1.65346	1.85797	2.08638	2.15193	2.13632	2.39635	1.92956	1.7749	1.83913	1.61893	1.68289	1.64099	1.96474	1.9352	1.55706	1.73227	1.91988	1.89104	1.90191	2.16515	1.93603	1.96307	1.87823	1.74271	2.15647	1.8695	1.82052	1.88594	1.78495	1.90163	1.80861	1.67145	1.65524	2.05748	1.96178	1.73302	1.7556	2.02571	1.71778	2.01422
Emin	1.72034	1.64562	1.51472	1.28005	1.41949	1.41156	1.38556	1.69963	1.36368	1.69516	1.62058	1.47324	1.54063	1.42522	1.83669	1.69843	1.56589	1.41099	1.60833	1.58349	1.88553	1.77871	1.40759	1.55362	1.71028	1.74805	1.53876	1.6343	1.70273	1.61369	1.56086	1.53265	1.68216	1.65637	1.64965	1.28897	1.38938	1.40923	1.60509	1.39663	1.31114	1.78643	1.55776	1.34222	1.55108	1.68809	1.39171	1.67003
θ	0.420714	0.313269	-0.566736	-0.264989	0.00200923	-0.516207	-0.693578	-0.160866	0.567551	0.472323	0.433173	0.635488	0.515581	-0.181472	-0.299183	-0.64886	-0.248373	0.808376	-0.843037	-0.364026	-0.518449	0.91553	-1.04906	-0.841471	-0.806901	-0.852237	0.84129	0.564887	0.75877	0.6192	0.256595	0.834441	0.04845	0.546221	0.683091	0.56106	0.622831	0.3826	0.458368	-0.106919	-0.571704	0.617554	0.419542	0.909237	0.342253	0.499469	0.669998	0.366721
420h
Region	1	2	3	4	5	6	7	8	9	10	11	12	13	14	15	16	17	18	19	20	21	22	23	24	25	26	27	28	29	30	31	32	33	34	35	36	37	38	39	40	41	42	43	44	45	46	47	48
Emaj	2.2044	2.40209	2.39223	3.02351	2.37273	2.90914	2.19207	2.13322	2.02227	2.40881	2.55264	2.72149	2.44195	3.68442	2.17674	1.89327	1.98417	2.05614	1.99555	2.02534	2.13284	2.13862	2.30949	2.17387	2.33512	2.09142	2.02259	2.29439	2.12897	2.04919	2.18089	2.15001	2.0257	2.00556	2.11088	2.30965	2.1677	2.13741	2.19858	1.96895	2.21516	2.20269	2.18705	2.21702	2.14827	2.2639	2.04419	1.98274
Emin	1.73859	1.50337	1.54404	1.55726	1.51304	1.43477	1.55191	1.76995	1.78185	1.80062	1.63798	1.57325	1.5342	1.88211	1.75142	1.67861	1.79842	1.61036	1.75945	1.78657	1.68517	1.71813	1.68865	1.72622	1.62257	1.66322	1.6988	1.58909	1.49548	1.66842	1.79246	1.54966	1.7671	1.74427	1.59492	1.54034	1.71436	1.73	1.72139	1.55474	1.40951	1.76741	1.672	1.63931	1.69598	1.7721	1.76108	1.61408
θ	-0.0830347	0.0932636	-0.610769	-0.248779	-0.00319155	-0.344512	-0.416704	-0.827772	-0.0222868	0.235902	0.228157	0.189489	0.274449	-0.19643	-0.594921	-0.575199	-0.620738	-0.505786	-0.475245	-0.185947	-0.632176	-0.371125	-0.497351	-0.747381	-0.852374	-0.736226	0.0914175	0.214943	0.259419	0.0303127	0.436485	0.0629842	0.366744	0.00931989	0.183858	0.23122	0.182131	0.379384	0.292048	-0.310078	-0.152164	0.210159	0.1834	0.374343	0.312426	0.241068	0.498031	0.450013
420h
Region	1	2	3	4	5	6	7	8	9	10	11	12	13	14	15	16	17	18	19	20	21	22	23	24	25	26	27	28	29	30	31	32	33	34	35	36	37	38	39	40	41	42	43	44	45	46	47	48	49
Emaj	3.95173	2.2044	2.40209	2.80553	2.16734	2.39223	2.13628	4.18875	3.34704	3.12852	2.13897	2.65286	2.90914	2.19207	2.24005	2.69266	2.44373	2.49791	4.30277	2.13322	1.95463	1.95591	2.55937	2.18122	2.2436	2.40881	2.55264	2.72149	2.44195	2.27858	3.74923	3.01997	2.17674	1.89327	1.98417	2.05614	1.99555	2.16244	2.02534	2.13284	2.13862	2.06286	2.20453	2.04854	1.91093	2.30949	2.17387	2.33512	2.09142
Emin	1.81984	1.73859	1.50337	1.4465	1.53211	1.54404	1.49322	1.89875	1.55876	1.74634	1.4678	1.56064	1.43477	1.55191	1.38575	1.55534	1.46775	1.55673	1.94987	1.76995	1.81581	1.6736	1.37432	1.62914	1.41134	1.80062	1.63798	1.57325	1.5342	1.60106	1.98146	1.83506	1.75142	1.67861	1.79842	1.61036	1.75945	1.75641	1.78657	1.68517	1.71813	1.83378	1.35029	1.68836	1.61336	1.68865	1.72622	1.62257	1.66322
θ	-0.195205	-0.0830347	0.0932636	0.0620752	-0.0494497	-0.610769	-0.0407492	-0.294383	-0.257763	-0.0806702	0.0499528	0.00168269	-0.344512	-0.416704	-0.200812	-0.234315	-0.0702862	-0.0487894	-0.395988	-0.827772	0.0273174	-0.140422	0.149342	0.206593	0.197212	0.235902	0.228157	0.189489	0.274449	0.281188	-0.0178887	-0.0757329	-0.594921	-0.575199	-0.620738	-0.505786	-0.475245	-0.194802	-0.185947	-0.632176	-0.371125	0.254113	0.206412	0.357246	0.142171	-0.497351	-0.747381	-0.852374	-0.736226
380h
Region	1	2	3	4	5	6	7	8	9	10	11	12	13	14	15	16	17	18	19	20	21	22	23	24	25	26	27	28	29	30	31	32	33	34	35	36	37	38	39	40	41	42	43	44	45	46	47	48	49
Emaj	15.9583	4.51217	6.11752	4.53269	4.29792	8.46223	4.35539	11.2204	14.3711	11.6666	6.42366	8.12842	13.8088	8.22393	6.91467	10.3545	6.75107	7.04481	14.9024	4.03082	3.21882	3.02756	4.88328	6.21598	4.4669	5.5039	6.90932	7.64911	6.05654	6.44257	11.9859	12.7978	4.92875	4.59236	4.04003	3.45873	3.7395	3.06087	2.98368	3.31444	3.03027	3.48994	4.22906	4.95987	4.73946	3.94849	7.06409	6.19032	5.18758
Emin	4.39758	2.78408	3.04482	2.8928	2.63568	3.32534	2.61524	4.21796	4.35869	4.93257	3.56933	3.79801	3.63769	3.51532	3.78342	3.94114	3.37648	3.84989	4.85981	2.38459	2.13096	2.13705	2.52712	3.47859	2.60365	3.23966	3.63352	3.48631	3.51169	3.39394	4.81756	4.23613	3.01749	2.92795	2.69998	2.33666	2.77465	2.10175	2.11756	2.20141	2.26137	2.27362	2.54917	2.86693	2.90883	2.64598	3.15428	3.17684	2.99745
θ	-0.26961	0.05397	-0.00888124	0.0107582	0.142979	-0.569064	0.0113735	-0.254335	-0.231511	-0.109354	0.0809373	-0.0171178	-0.279911	-0.33626	-0.160669	-0.166028	-0.0657487	-0.0844891	-0.313125	-0.534383	-0.0807077	-0.0773811	0.10464	0.234999	0.16972	0.208981	0.218191	0.206361	0.334976	0.0517506	-0.0453037	-0.211725	-0.610026	-0.497808	-0.419785	-0.392456	-0.581378	-0.278721	-0.267316	-0.623097	-0.562742	0.0172173	0.168057	0.272534	0.0648505	-0.403336	-0.481898	-0.526825	-0.557606
380h
Region	1	2	3	4	5	6	7	8	9	10	11	12	13	14	15	16	17	18	19	20	21	22	23	24	25	26	27	28	29	30	31	32	33	34	35	36	37	38	39	40	41	42	43	44	45	46	47	48	49
Emaj	13.015	4.51217	4.53269	4.29664	7.79539	4.35539	6.42366	12.4613	6.31038	7.04481	9.11231	13.7709	4.03082	3.21882	3.02756	4.88328	5.87486	4.38521	5.08789	3.75971	6.82745	5.97356	4.38419	7.86452	12.7577	4.92875	4.59236	4.04003	3.45873	3.7395	3.06087	2.98368	3.31444	3.03027	3.48994	4.45809	3.94821	4.73946	3.94849	5.54319	3.20388	3.42963	3.89852	2.70849	3.20286	3.13773	3.05383	3.08465	3.2728
Emin	4.80962	2.78408	2.8928	2.65524	3.37433	2.61524	3.56933	4.01863	3.41143	3.84989	4.28838	4.55533	2.38459	2.13096	2.13705	2.52712	3.53194	2.47987	2.77653	2.56566	3.41454	3.3446	2.54927	3.76573	4.00514	3.01749	2.92795	2.69998	2.33666	2.77465	2.10175	2.11756	2.20141	2.26137	2.27362	2.64293	2.23114	2.90883	2.64598	3.06175	2.02423	2.26109	2.3937	1.70666	2.20175	1.89652	2.0824	2.10337	2.18596
θ	-0.159635	0.05397	0.0107582	0.134911	-0.447243	0.0113735	0.0809373	-0.223937	-0.134541	-0.0844891	-0.0540312	-0.263803	-0.534383	-0.0807077	-0.0773811	0.10464	0.227313	0.175115	0.216381	0.0308157	0.143381	-0.0451288	0.179357	0.0052601	-0.324419	-0.610026	-0.497808	-0.419785	-0.392456	-0.581378	-0.278721	-0.267316	-0.623097	-0.562742	0.0172173	0.166232	0.28467	0.0648505	-0.403336	-0.544335	0.134289	0.134091	0.167562	-0.0436533	0.0959527	0.065115	0.0258135	0.030817	-0.0107167
340h
Region	1	2	3	4	5	6	7	8	9	10	11	12	13	14	15	16	17	18	19	20	21	22	23	24	25	26	27	28	29	30	31	32	33	34	35	36	37	38	39	40	41	42	43	44	45	46	47	48	49
Emaj	42.752	19.0036	13.9674	13.7423	39.4654	15.946	18.0543	43.1322	21.5846	23.8301	19.7905	36.6821	12.8694	10.8784	10.0328	17.8219	18.7462	15.2732	10.0122	12.6535	25.5392	8.64208	10.8062	19.3236	32.5567	18.6596	19.8843	13.8178	10.6597	10.1448	11.8168	9.40632	8.17561	11.4961	11.0817	11.5643	13.2725	12.6793	16.1741	24.7149	10.6366	8.22673	16.9378	8.18165	11.982	9.81797	10.0056	8.22114	11.409
Emin	9.17733	7.94947	6.01283	5.95501	8.48965	7.18706	6.94178	7.66348	7.53604	7.40813	5.82428	8.17629	5.54737	4.59671	4.22483	5.85105	6.43788	6.53194	5.17241	6.4865	7.01655	4.26038	5.18883	6.61566	6.963	7.06971	6.71869	5.69983	5.11002	4.59691	4.8262	4.41978	3.88616	4.50659	5.004	5.67712	6.27038	6.47038	5.72624	8.44659	4.45539	4.80631	6.55423	3.67335	4.68654	4.1133	4.62998	3.55106	5.12131
θ	-0.217468	-0.0686441	0.0451449	0.0638529	-0.423824	-0.0515155	-0.0060762	-0.240476	-0.183751	-0.0604937	-0.0872858	-0.324976	-0.470613	-0.219617	-0.1732	-0.0370782	0.137819	0.0800637	0.231726	0.1411	0.13579	-0.0297766	0.123797	-0.0016794	-0.452163	-0.424644	-0.485544	-0.501153	-0.372634	-0.484768	-0.403354	-0.427806	-0.443639	-0.646534	-0.00363547	0.0690398	0.161345	0.0571471	-0.426414	-0.524958	0.0277655	-0.121959	0.0453387	0.000493992	-0.0457315	-0.0602264	-0.234246	-0.135107	-0.085117
340h
Region	1	2	3	4	5	6	7	8
Emaj	16.8843	28.1415	17.2331	10.4184	12.183	13.616	12.3901	12.7503
Emin	6.64433	7.53024	6.45428	4.79419	6.09191	6.21793	5.45257	5.21469
θ	0.00388977	-0.278079	-0.486941	-0.270749	0.104791	0.0713048	-0.37742	0.0133929
300h
Region	1	2	3	4	5	6	7	8
Emaj	29.1794	48.2034	19.111	24.0225	17.8008	27.3915	29.8754	26.2268
Emin	8.781	12.5133	6.87434	8.43917	7.77038	10.939	8.97744	8.45315
θ	-0.190612	-0.262303	-0.287804	-0.118727	-0.0186168	-0.018562	-0.286757	0.0365804
[truncated: 39 more columns]

## Sheet: Lateral
460h	1	2	3	4	5	6	7	8	9	10	11	12	13	14	15	16	17	18	19	20	21	22	23	24	25	26	27	28	29	30	31	32	33	34	35	36	37	38	39	40	41	42	43	44	45	46	47	48	49
Emaj	2.34654	2.41998	2.22439	2.08891	2.4003	1.8858	2.79663	2.48456	2.43541	1.77984	1.96705	1.85097	1.699	1.82067	2.98339	3.41858	1.97728	2.90489	2.45395	2.47534	2.4329	2.43247	2.15234	2.28	1.96184	1.90611	1.93876	1.85998	1.97881	1.73814	1.75713	2.24812	1.85723	1.81829	1.83085	1.76798	1.92164	1.70634	1.65828	1.90374	1.91017	1.9745	1.74826	1.68127	1.76788	2.33873	2.01268	2.09773	2.0925
Emin	1.72604	1.6835	1.79143	1.6013	1.65375	1.49695	1.79948	1.76823	1.65056	1.54165	1.68672	1.40086	1.5226	1.58708	2.01583	2.21668	1.48334	1.95852	1.9104	1.7086	1.58819	1.59914	1.63819	1.85616	1.62338	1.67105	1.62084	1.68051	1.74485	1.44944	1.34201	1.44872	1.32183	1.37466	1.64805	1.54046	1.5043	1.57472	1.55055	1.82034	1.28973	1.92093	1.57324	1.48613	1.38261	1.424	1.48839	1.80137	1.71638
θ	0.716526	0.693236	0.675697	0.665432	0.614446	0.632267	0.519751	0.702077	0.723757	0.923138	-1.24124	-0.0225136	-1.08925	-0.559044	0.35723	0.477664	-0.119464	0.492589	0.44974	0.592408	0.506461	0.595229	0.00243567	0.544139	0.803379	0.598741	0.511447	0.306455	0.142549	-1.51407	-1.01747	-1.3378	-1.35555	0.442017	-1.2071	-1.54163	-1.33395	1.51707	0.701002	1.12166	-1.52013	1.50449	0.184276	-1.43379	0.917287	0.690568	0.64342	1.1243	1.19997
420h	1	2	3	4	5	6	7	8	9	10	11	12	13	14	15	16	17	18	19	20	21	22	23	24	25	26	27	28	29	30	31	32	33	34	35	36	37	38	39	40	41	42	43	44	45	46	47	48	49
Emaj	4.12397	4.36408	3.02215	3.58051	4.4808	4.13599	6.03464	5.08925	4.99671	3.18166	1.78549	2.31735	2.16112	2.98469	6.29737	7.12753	2.97768	4.92176	5.34902	4.56369	4.76167	5.35941	3.39034	4.34768	3.15154	3.47946	3.13739	2.79549	2.87342	1.92104	1.79773	1.87655	1.84281	3.37652	1.95818	1.95513	1.89764	2.12503	1.86163	2.03726	1.68308	2.43446	2.46954	2.1812	2.57801	3.34933	3.92095	2.33767	2.11619
Emin	2.19956	2.08089	1.92976	1.94482	1.91903	1.94551	2.70595	2.41384	2.60157	1.92261	1.65051	2.09563	1.93122	1.97672	2.69195	2.90805	1.76737	2.19382	3.18174	2.46238	2.08229	2.39336	2.17512	2.47992	2.04407	2.08818	1.91546	2.00654	1.8804	1.61744	1.5535	1.63532	1.5258	1.65207	1.68197	1.63861	1.58093	1.8503	1.65883	1.92414	1.54087	1.89912	1.89257	1.71968	1.63525	1.67311	1.90401	1.85744	1.79071
θ	0.828319	0.744671	0.784105	0.781998	0.625793	0.597865	0.612986	0.742305	0.804341	0.564529	-0.664104	0.592933	1.39521	-0.310809	0.64112	0.560511	-0.540987	0.556601	0.375038	0.542052	0.561075	0.559303	0.360727	0.353608	0.50464	0.427544	0.523146	0.637207	0.63495	1.44794	-1.04065	-1.54205	-1.14338	0.547057	-1.24667	-1.00462	-1.19388	-1.46456	-0.999356	-0.0568764	-0.752646	1.09855	0.757104	1.06071	0.862446	0.685934	0.685928	0.690266	0.598402
420h	1	2	3	4	5	6	7	8	9	10	11	12	13	14	15	16	17	18	19	20	21	22	23	24	25	26	27	28	29	30	31	32	33	34	35	36	37	38	39	40	41	42	43	44	45	46	47	48	49
Emaj	4.50118	3.02215	3.57798	4.4808	4.13599	3.18166	1.78549	2.31735	2.04369	2.21372	2.98469	5.76126	2.0492	3.40471	2.62836	5.34902	4.76167	4.93194	3.39034	4.34768	3.15154	3.47946	3.13739	2.79549	2.87342	1.93206	1.76503	1.8526	1.84281	1.89453	1.82134	2.12242	2.78291	1.9051	2.67174	2.45084	1.95818	1.95513	1.89764	2.12503	1.82288	1.77195	2.12637	1.84081	1.76515	1.82824	1.75626	2.03726	1.73131
Emin	2.20941	1.92976	1.93786	1.91903	1.94551	1.92261	1.65051	2.09563	1.81828	1.9376	1.97672	2.6921	1.74965	1.75124	1.77037	3.18174	2.08229	2.43061	2.17512	2.47992	2.04407	2.08818	1.91546	2.00654	1.8804	1.59728	1.42399	1.54388	1.5258	1.62734	1.52716	1.622	1.55101	1.74238	1.75393	1.7593	1.68197	1.63861	1.58093	1.8503	1.62716	1.59421	1.89466	1.63953	1.61005	1.56385	1.55159	1.92414	1.52052
θ	0.762646	0.784105	0.7505	0.625793	0.597865	0.564529	-0.664104	0.592933	-1.19972	1.20835	-0.310809	0.62768	-1.06849	-0.590905	-0.585001	0.375038	0.561075	0.551522	0.360727	0.353608	0.50464	0.427544	0.523146	0.637207	0.63495	1.45371	-0.993599	-1.56054	-1.14338	-1.02498	-1.27944	1.24468	0.756494	-1.50077	0.553203	0.788322	-1.24667	-1.00462	-1.19388	-1.46456	-0.670568	-0.962096	-1.46945	1.53547	-1.25778	-0.866256	-0.290232	-0.0568764	-0.972299
380h	1	2	3	4	5	6	7	8	9	10	11	12	13	14	15	16	17	18	19	20	21	22	23	24	25	26	27	28	29	30	31	32	33	34	35	36	37	38	39	40	41	42	43	44	45	46	47	48	49
Emaj	10.8612	9.8267	10.587	9.64207	11.5066	11.6413	3.01784	4.36302	3.29707	5.70319	11.5568	12.1271	5.05305	9.73237	7.31224	9.11238	10.9072	11.4477	7.22471	9.34401	8.6082	9.45775	9.7896	8.4546	8.85411	4.40755	2.68637	4.85874	2.83182	3.02169	3.93693	6.26012	9.92568	5.27471	4.94481	5.26657	4.69073	3.29285	3.35807	5.13762	2.72821	3.11148	4.1378	4.13813	2.71925	3.39971	2.67698	6.53406	2.45862
Emin	4.55292	4.28517	4.46811	5.52647	6.59205	6.56352	1.9608	3.04354	2.48424	3.08173	4.92615	6.20705	2.88567	3.59466	3.89145	5.83964	7.25525	6.4041	5.4534	5.92656	5.99671	5.89183	5.7859	4.73883	5.08854	2.73171	2.16677	2.99328	2.40462	2.40789	2.59166	3.45354	4.22938	3.27607	3.35596	4.23843	2.81418	2.2194	2.33137	2.66437	2.11908	2.21174	2.41981	2.7112	2.20521	2.47011	2.03051	4.15202	2.29837
θ	1.07701	1.17009	1.10411	0.971919	1.06171	1.04465	-0.391581	-1.29537	-0.991512	-1.35301	-0.474666	0.743555	-1.0822	-0.497329	-0.790226	1.1506	1.20734	0.899062	1.49618	0.684451	1.32239	1.42291	1.45997	1.4725	-1.55634	-1.52892	-1.01661	-1.34688	-1.34116	-1.27197	-1.36787	1.33716	0.845402	-1.09558	0.347157	1.3194	-1.04354	-0.613037	-0.881524	-1.41099	-0.953801	-1.03812	-1.2372	-1.39407	-1.26476	-0.703957	-0.774507	-0.440677	-0.845899
380h	1	2	3	4	5	6	7	8	9	10	11	12	13	14	15	16	17	18	19	20	21	22	23	24	25	26	27	28	29	30	31	32	33	34	35	36	37	38	39	40	41	42	43	44	45	46	47	48	49
Emaj	10.2897	3.01784	4.36302	3.29707	5.70319	8.34571	5.05305	8.16172	12.1271	9.11238	8.4311	8.66442	4.40755	2.68637	2.83182	3.02169	6.7972	8.3121	4.57638	4.69073	3.29285	3.35807	5.13762	2.72821	3.11148	4.1378	4.13813	2.71925	3.39971	2.67698	2.45862	2.30709	9.57693	10.2903	11.3545	9.43308	5.49582	2.22854	2.75819	2.86884	2.45458	3.46882	9.56494	2.84323	3.58232	2.44085	2.4329	2.45534	10.1715
Emin	6.21197	1.9608	3.04354	2.48424	3.08173	4.43248	2.88567	3.87059	6.20705	5.83964	6.07234	4.94449	2.73171	2.16677	2.40462	2.40789	3.79722	3.85061	2.93308	2.81418	2.2194	2.33137	2.66437	2.11908	2.21174	2.41981	2.7112	2.20521	2.47011	2.03051	2.29837	2.20312	4.55257	4.17688	5.16912	4.74961	3.56341	2.03432	2.07248	2.03548	2.20651	2.16784	4.78056	2.35206	2.79479	1.88694	2.12772	2.31397	3.48781
θ	1.13061	-0.391581	-1.29537	-0.991512	-1.35301	-0.461452	-1.0822	-0.633369	0.743555	1.1506	1.27172	1.53543	-1.52892	-1.01661	-1.34116	-1.27197	1.33703	0.662435	-1.27519	-1.04354	-0.613037	-0.881524	-1.41099	-0.953801	-1.03812	-1.2372	-1.39407	-1.26476	-0.703957	-0.774507	-0.845899	-0.737755	1.54212	1.12119	1.05964	0.210068	0.312662	-0.291004	-0.07524	-0.0185649	-0.0790374	0.119712	1.02031	-0.709314	0.0292084	-0.870559	-0.820057	0.216849	0.740997
340h	1	2	3	4	5	6	7	8	9	10	11	12	13	14	15	16	17	18	19	20	21	22	23	24	25	26	27	28	29	30	31	32	33	34	35	36	37	38	39	40	41	42	43	44	45	46	47	48	49
Emaj	22.4824	10.9237	14.3054	10.3793	22.6007	28.8571	11.0275	18.9831	21.7212	16.2267	25.994	29.5898	14.0723	12.596	14.6395	13.4349	16.3696	21.521	19.2355	17.4591	17.5159	15.6927	23.8725	9.51189	10.9778	20.4912	19.9497	14.3098	13.2334	11.6451	9.98744	10.8003	33.0499	22.5128	24.6339	29.7731	21.9119	14.2031	13.9652	7.81904	15.0242	16.9085	22.6927	12.7142	19.8184	11.6285	9.12587	19.9729	15.7591
Emin	10.2039	4.00653	4.46492	4.32575	4.99586	12.0739	5.05647	5.89028	10.6865	9.09097	11.1973	7.35311	9.59258	4.78367	5.74495	6.29409	12.9772	8.87606	8.86481	7.17564	5.52638	4.92796	6.98638	3.54729	4.10859	5.65906	6.57906	4.90217	5.244	4.44913	4.38567	5.39347	9.56616	9.74431	11.2184	7.92778	7.17721	4.14674	4.75343	3.13026	5.01286	4.72741	9.39591	4.4082	6.01419	4.85791	4.13923	5.24122	6.18509
θ	-1.50318	-0.401335	-1.1343	-0.795889	-1.18077	-0.426111	-1.08804	-0.707598	1.06061	-1.55106	-1.38347	-1.29836	-1.13271	-0.821517	-0.600846	-0.763936	-1.33095	0.29458	-0.822706	-0.685534	-0.480951	-0.623897	-1.26658	-0.829076	-0.772762	-1.07639	-1.14002	-0.854167	-0.516222	-0.535884	-0.676684	-0.520322	-1.3935	1.2743	1.43882	0.0780232	0.0799146	-0.344108	-0.269575	-0.256894	-0.17768	-0.161122	1.34315	-0.371872	-0.0884979	-0.496281	-0.4187	-0.196061	0.967108
340h	1	2	3	4	5	6	7	8	9	10	11	12	13	14	15
Emaj	13.9022	23.6702	10.3793	16.3357	12.4919	31.0336	25.7879	12.9126	17.3269	15.1217	21.8411	19.8195	13.6881	12.5682	19.8392
Emin	4.80491	6.72039	4.32575	5.02541	6.75432	13.8808	11.229	5.31244	9.75456	6.06927	9.90514	6.19707	4.59545	5.37018	9.97131
θ	-0.384871	-1.24853	-0.795889	-0.616685	-1.26172	1.09906	-1.38333	-0.700439	-0.962169	-0.563537	1.50023	0.00627205	-0.278864	-0.411448	0.815816
300h	1	2	3	4	5	6	7	8	9	10	11	12	13	14	15
Emaj	21.0254	32.1564	14.4306	12.0483	17.5729	45.857	30.9033	27.3026	35.9781	16.6601	36.6813	19.0328	21.3803	31.986	37.7116
Emin	5.58367	14.2944	6.64342	7.70003	9.9725	17.5843	14.582	7.30693	19.1768	5.75944	14.9586	5.06765	5.54349	7.77351	18.451
θ	-0.321955	-1.12595	-0.589676	-1.26176	-1.16132	1.18031	-1.4682	-0.427779	-0.0566133	-0.393534	-1.49472	-0.120859	-0.244326	-0.360506	0.865429
[truncated: 39 more columns]

## Sheet: Ventral
460h	1	2	3	4	5	6	7	8	9	10	11	12	13	14	15	16	17	18	19	20	21	22	23	24	25	26	27	28	29	30	31	32	33	34	35	36	37	38	39	40	41	42	43	44	45	46	47	48	49
Emaj	2.06114	2.44807	2.27553	2.24228	1.96116	1.81457	2.03574	2.16152	2.58986	2.34468	2.06995	2.20751	2.02722	2.02132	1.87494	2.01701	2.13657	2.05581	1.85662	2.22105	2.1199	2.22308	1.95015	2.09321	2.30074	2.23203	2.43067	2.38481	2.208	1.80936	2.1352	1.99346	2.4011	2.58191	1.93187	1.87257	1.86833	1.826	2.02255	1.94935	2.02316	2.005	2.01837	1.80914	1.94832	2.46456	1.80858	1.95693	2.02226
Emin	1.75847	1.72626	1.51134	1.76064	1.7261	1.63594	1.50374	1.79155	1.56119	1.55813	1.36585	1.47253	1.49053	1.64779	1.72384	1.77742	1.75899	1.76311	1.60072	1.66656	1.75773	1.64679	1.56809	1.5013	1.56163	1.51512	1.74985	1.61437	1.67193	1.74136	1.5676	1.65694	1.61135	1.41654	1.77757	1.73633	1.67902	1.56641	1.78884	1.63289	1.7352	1.63442	1.83027	1.49031	1.50643	1.48461	1.42385	1.69684	1.78067
θ	-0.139689	0.486578	-0.270249	-0.474371	-0.624031	-0.332466	-1.01249	-0.663936	-0.145692	0.560756	-0.369725	0.1413	0.244987	-0.368859	0.503184	-0.0989614	0.608506	0.462506	0.044185	-0.802471	-0.858295	0.73443	0.0762633	0.637133	0.455782	0.526804	0.457756	0.545315	0.606947	-0.417691	-0.00301087	-0.365562	0.0819498	0.120516	-0.358149	-0.507986	-0.328269	0.566015	-0.77682	-0.678038	-0.614937	0.525962	-0.335947	0.858687	0.851102	0.477504	0.466062	0.0042938	-0.0818661
420h	1	2	3	4	5	6	7	8	9	10	11	12	13	14	15	16	17	18	19	20	21	22	23	24	25	26	27	28	29	30	31	32	33	34	35	36	37	38	39	40	41	42	43	44	45	46	47	48	49
Emaj	2.10093	2.57453	2.78731	2.7804	2.15111	2.14146	2.47266	2.20245	3.65088	2.26338	3.02058	2.8497	2.76639	2.5762	1.93307	2.17952	2.35487	2.40282	2.42774	2.39346	2.14399	2.24472	2.74694	1.98645	2.19797	2.16906	2.54208	2.38456	2.37212	2.61224	2.90744	2.76853	2.78091	3.80247	2.64756	1.97312	1.94495	1.93693	2.41858	2.19176	2.08882	2.63843	2.83223	2.43106	2.16796	2.1471	2.22691	2.49123	2.27679
Emin	1.98339	2.11136	1.93406	1.9272	2.05282	1.85193	2.21302	2.14656	1.9012	1.86631	1.89219	1.94394	1.99394	1.85233	1.88397	2.06643	2.07692	2.13085	2.27529	2.02944	1.85346	2.03664	1.95191	1.73313	1.96455	1.76399	2.06479	2.02394	1.88447	2.32263	2.23955	2.05145	2.08149	2.01692	2.33549	1.6937	1.84091	1.86412	2.28008	1.89199	1.89581	2.32539	2.4748	2.03026	2.13113	1.92206	1.91872	2.14349	2.13205
θ	-0.439566	0.635932	-0.262429	-0.521387	-0.73452	1.49484	-1.14742	-1.28743	-0.267543	0.947078	-0.34669	0.137553	0.361905	-0.429915	1.5181	-0.241143	0.580321	0.497033	0.371514	-1.10768	-1.31423	1.20134	-0.356451	0.617233	0.456672	0.581088	0.500464	0.664278	0.824178	0.303326	0.142391	-0.342601	0.188657	0.079189	0.293585	-1.14117	-1.00986	-1.28421	-0.838806	-1.16476	-1.34506	-0.193859	-0.344757	-0.617944	0.124761	0.874595	0.955098	-0.15469	0.685137
420h	1	2	3	4	5	6	7	8	9	10	11	12	13	14	15	16	17	18	19	20	21	22	23	24	25	26	27	28	29	30	31	32	33	34	35	36	37	38	39	40	41	42	43	44	45	46	47	48	49
Emaj	2.10093	2.57453	3.0147	2.71886	2.7804	2.20593	2.613	2.15111	2.16264	2.0844	2.47266	2.20245	4.04516	2.02397	2.26338	2.15293	2.86906	3.18434	3.34404	3.37544	2.83303	2.69718	2.5762	3.28418	3.65377	2.76677	3.11624	2.94076	3.06534	2.95763	3.38551	2.40434	2.92272	1.93307	2.17952	2.35487	2.40282	2.04823	1.94175	1.88705	2.12039	1.97055	2.14677	2.1298	2.37264	2.20469	2.39346	2.14399	2.68267
Emin	1.98339	2.11136	2.00964	1.8784	1.9272	1.94054	2.16286	2.05282	1.87467	1.86414	2.21302	2.14656	1.73969	1.77282	1.86631	2.06674	1.86345	1.92157	1.77868	1.86627	1.98929	1.88646	1.85233	1.68385	1.92447	1.96706	1.90884	2.00242	2.09588	1.97415	1.75773	1.69306	1.85122	1.88397	2.06643	2.07692	2.13085	1.91015	1.65932	1.67535	1.92209	1.91977	1.78418	1.94084	2.2498	1.83957	2.02944	1.85346	2.51042
θ	-0.439566	0.635932	-0.216285	-0.445031	-0.521387	0.209493	-0.212545	-0.73452	1.17451	1.47173	-1.14742	-1.28743	-0.102031	1.06091	0.947078	0.19755	-0.32013	-0.369349	-0.293901	-0.350494	0.346338	-0.156206	-0.429915	0.273575	0.265214	0.310986	0.260905	0.341475	0.248059	0.412653	0.273664	0.0970551	0.262648	1.5181	-0.241143	0.580321	0.497033	-0.206629	-1.07212	-1.24815	1.31594	-1.27164	1.29158	-1.56756	0.533097	-1.46797	-1.10768	-1.31423	0.648657
380h	1	2	3	4	5	6	7	8	9	10	11	12	13	14	15	16	17	18	19	20	21	22	23	24	25	26	27	28	29	30	31	32	33	34	35	36	37	38	39	40	41	42	43	44	45	46	47	48	49
Emaj	3.15013	5.30551	5.9671	6.89949	8.01177	3.72704	6.3266	2.98523	4.89212	2.96784	5.29476	3.37466	11.9207	2.83087	2.9833	2.37864	9.49427	8.38631	13.3251	7.22402	6.53923	7.06471	6.95763	7.26437	10.0959	8.60729	7.27991	7.41151	4.53131	6.01832	9.30052	6.04899	6.79814	2.45406	3.06073	2.84878	3.16075	2.47125	2.6548	2.32127	2.80871	3.35131	3.23541	4.282	3.8959	3.5119	5.51021	4.42705	3.97188
Emin	2.3403	3.57885	2.65002	2.81425	3.16018	3.2182	3.33391	2.28841	4.3056	2.76965	4.58063	2.46539	4.15847	2.41817	2.6282	2.03175	3.18069	2.70592	4.11565	2.83851	2.82023	3.058	3.18636	2.43685	2.88035	2.95624	3.13372	2.73901	2.38054	2.40739	2.76509	2.76385	2.70786	2.15627	2.30663	2.42276	2.36149	2.31487	2.30768	2.22126	2.2605	2.68146	2.6181	3.48492	3.17627	3.00727	3.76905	3.47142	3.64628
θ	-0.280512	0.811457	-0.343321	-0.313598	-0.515423	0.0782837	-0.366013	-0.115176	0.716358	1.25538	-1.03138	-0.44742	-0.230496	1.0626	0.713232	0.460376	-0.426033	-0.376217	-0.400321	-0.355935	0.343926	-0.35686	-0.506835	0.142238	0.234525	0.305607	0.129468	0.214461	0.137352	0.11537	0.169745	0.0587903	0.118476	-0.000919357	-0.00318699	0.010442	0.292636	1.35348	0.955102	0.69435	-1.31983	1.05882	0.906045	0.832727	0.541744	-1.52079	-1.1477	-1.41979	-0.287971
380h	1	2	3	4	5	6	7	8	9	10	11	12	13	14	15	16	17	18	19	20	21	22	23	24	25	26	27	28	29	30	31	32	33	34	35	36	37	38	39	40	41	42	43	44	45	46	47	48	49
Emaj	4.31395	4.99605	3.15013	5.30551	6.89949	8.01177	5.321	6.3266	2.98523	4.89212	2.96784	5.29476	3.37466	12.5771	2.83087	2.9833	2.37864	9.49427	8.38631	9.1911	6.53923	7.06471	6.95763	10.0959	8.00861	5.5716	7.95571	9.30052	7.03482	2.45406	3.06073	2.84878	3.16075	2.47125	2.6548	2.32127	2.80871	3.35131	3.23541	4.282	3.8959	3.5119	5.51021	4.42705	3.97188	3.03863	2.91249	5.80384	8.19092
Emin	2.40822	2.29823	2.3403	3.57885	2.81425	3.16018	2.88705	3.33391	2.28841	4.3056	2.76965	4.58063	2.46539	4.19707	2.41817	2.6282	2.03175	3.18069	2.70592	3.2622	2.82023	3.058	3.18636	2.88035	2.86	2.50277	2.54793	2.76509	2.9173	2.15627	2.30663	2.42276	2.36149	2.31487	2.30768	2.22126	2.2605	2.68146	2.6181	3.48492	3.17627	3.00727	3.76905	3.47142	3.64628	2.5696	2.88055	4.19429	4.76852
θ	0.20728	-0.471373	-0.280512	0.811457	-0.313598	-0.515423	-0.380782	-0.366013	-0.115176	0.716358	1.25538	-1.03138	-0.44742	-0.324489	1.0626	0.713232	0.460376	-0.426033	-0.376217	-0.310912	0.343926	-0.35686	-0.506835	0.234525	0.265107	0.102976	0.164312	0.169745	0.123916	-0.000919357	-0.00318699	0.010442	0.292636	1.35348	0.955102	0.69435	-1.31983	1.05882	0.906045	0.832727	0.541744	-1.52079	-1.1477	-1.41979	-0.287971	1.47364	0.968654	-0.147551	-0.622417
340h	1	2	3	4	5	6	7	8	9	10	11	12	13	14	15	16	17	18	19	20	21	22	23	24	25	26	27	28	29	30	31	32	33	34	35	36	37	38	39	40	41	42	43	44	45	46	47	48	49
Emaj	7.50091	9.48045	10.023	18.0866	13.4819	18.706	8.04216	8.53415	7.75765	16.4519	8.63618	22.5694	10.6495	24.4835	6.49366	8.07048	6.15158	19.5818	17.7449	21.4974	11.3821	11.4682	12.4047	13.0921	12.8167	10.1388	12.0617	11.1172	11.9409	7.49006	7.97631	8.49479	7.44293	5.86749	5.32266	5.53163	6.82089	10.4278	11.6658	13.1911	9.39446	9.21812	16.6589	16.2577	8.56631	5.92823	6.3422	20.4624	18.3261
Emin	4.14212	4.27803	4.56318	8.69686	5.27718	5.17734	3.59423	4.2381	3.53388	9.01231	7.48748	10.4109	4.55328	6.36382	5.18422	6.45048	4.52897	4.58844	4.90042	4.74365	5.18379	4.52255	4.70208	4.04514	4.68216	4.77874	3.82997	3.92098	4.62528	3.48191	4.19868	3.11791	4.12367	5.18521	4.68696	5.22608	6.30272	6.84076	7.54766	8.83445	5.91401	7.33327	9.26757	9.8147	6.59006	5.57496	5.37544	7.91291	8.57361
θ	0.241245	-0.303689	-0.196157	0.653888	-0.313463	-0.43281	-0.14201	-0.247958	-0.176059	0.0348121	1.0135	-0.65583	-0.40789	-0.172076	-0.0614216	0.11033	-0.0430716	-0.379609	-0.337133	-0.287145	0.408809	-0.265146	-0.380464	0.235681	0.388674	0.187554	0.136933	0.177973	0.0995354	-0.0842523	-0.0657928	-0.100841	0.102317	0.891512	0.457515	-0.44599	-0.753147	1.02383	0.784336	0.82347	0.771288	-0.75562	-0.746904	-0.701607	-1.43199	-0.962828	-1.4899	-0.0277949	-0.662031
340h	1	2	3	4	5	6	7	8	9	10	11	12	13	14	15	16	17	18	19	20	21	22	23	24	25	26	27	28
Emaj	8.69086	12.0078	16.4456	7.33583	14.2079	8.29496	6.38076	11.8753	11.5445	10.1388	7.48934	7.86031	6.92193	9.29651	5.92823	20.0845	6.75327	11.2423	10.5367	16.2997	14.455	7.01484	14.683	10.4594	7.98505	17.5602	18.5408	13.4922
Emin	4.24633	4.55546	5.12552	3.79969	4.46181	7.89903	5.21703	5.33043	4.80473	4.77874	4.15344	3.72646	5.74615	6.84329	5.57496	8.61639	5.1137	5.18339	8.52413	4.70801	10.723	5.44888	7.91016	6.27435	7.65991	8.48339	8.10764	7.07506
θ	-0.274021	-0.297124	-0.445301	0.121343	-0.292501	0.880435	0.0742987	0.369728	-0.0314268	0.187554	-0.0697965	-0.0111064	1.17025	0.907601	-0.962828	-0.358246	0.246986	0.28703	0.443851	0.157276	0.316927	-0.386014	-0.654458	-0.914414	-1.1166	0.582767	0.395553	-0.832172
300h	1	2	3	4	5	6	7	8	9	10	11	12	13	14	15	16	17	18	19	20	21	22	23	24	25	26	27	28
Emaj	20.1393	25.7499	32.1688	16.4275	27.9953	18.5845	15.9535	29.5999	31.4545	27.3037	32.803	14.0573	17.4602	18.7922	11.7734	50.1007	12.8332	27.7329	19.9651	53.8696	28.4241	19.1526	33.1915	17.417	28.5963	25.5375	47.0533	23.6036
Emin	5.71594	11.1215	10.5581	10.529	8.76014	10.3974	7.7146	12.9796	11.2532	11.2964	7.81926	6.00455	12.2627	13.9211	7.87346	16.4971	5.84483	8.47476	14.2253	12.3978	11.8681	8.51213	10.438	9.94365	12.6264	7.77539	14.8067	11.8305
θ	-0.224048	-0.240984	-0.465244	-0.0106831	-0.256463	-0.0716476	0.00631185	0.318548	0.109263	0.143667	-0.0970035	-0.124744	0.00645377	0.283756	-0.102196	-0.153644	0.177438	0.0984972	0.169317	-0.0102043	0.0212066	-0.297767	-0.523236	-0.430139	-0.0604702	0.301878	0.136719	-0.497292
[truncated: 60 more columns]

## Sheet: Tube
460h	1	2	3	4	5	6	7	8	9	10	11	12	13	14	15	16	17	18	19
Emaj	2.51677	2.38849	2.52926	2.70304	2.6333	2.27069	2.77584	2.22556	2.44685	2.46939	2.0211	2.52529	2.44242	3.11752	2.49874	3.45622	2.45408	2.14179	2.17214
Emin	1.6203	1.75163	1.55785	1.97025	1.71273	1.38324	2.23313	1.68948	2.03829	1.94521	1.45341	2.00838	1.46893	1.59146	1.69917	1.56125	2.00178	1.52397	1.4847
θ	0.0113431	-0.204751	0.144429	0.463332	0.394736	0.207921	-4.44166e-05	0.36612	0.0919052	0.205775	-0.0491378	0.307175	0.082692	0.0795753	-0.0811668	-0.219937	0.0997108	0.0568023	0.0884474
420h	1	2	3	4	5	6	7	8	9	10	11	12	13	14	15	16	17	18	19
Emaj	4.34762	3.78126	3.0915	3.32658	2.88755	2.9283	5.65352	4.01877	4.05325	3.54147	3.54292	5.30217	3.20017	4.31185	3.21727	4.9872	3.33065	3.08394	3.08036
Emin	1.84207	1.64856	1.61626	2.59619	2.31697	1.51024	2.75401	2.09297	2.54086	2.34819	1.94483	2.58769	1.54528	1.7677	1.73197	1.54562	1.72258	1.59552	1.53235
θ	0.0296979	0.0419896	0.0228792	0.819535	0.653184	0.157451	-0.0498882	-0.343475	0.488754	0.307957	0.118252	0.0727385	0.136366	0.18724	-0.197465	-0.278858	-0.177517	0.0539055	0.088897
420h	1	2	3	4	5	6	7	8	9	10	11	12	13	14	15	16	17	18	19	20	21	22	23	24	25	26	27	28	29	30	31	32	33	34	35	36	37	38	39	40	41	42	43	44	45	46	47	48	49
Emaj	3.02365	4.37197	2.90231	3.32929	4.33973	5.87014	3.14809	4.34762	3.78126	2.79869	4.25878	6.24437	3.49072	4.57543	3.32658	2.65846	5.57966	6.25255	4.51097	4.81686	2.62254	3.89293	4.48221	4.56202	3.24768	3.53915	4.12425	4.23419	5.65352	3.54147	3.50638	3.56324	4.42219	2.91802	2.90624	3.74018	2.85632	4.0183	3.98352	3.46805	3.14462	5.11739	4.42735	5.48879	4.99589	3.29766	3.71016	2.63351	2.87805
Emin	1.95466	1.24169	1.99764	2.5189	1.88646	1.7154	1.46702	1.84207	1.64856	1.65207	1.51418	1.34407	1.54099	1.32574	2.59619	2.16157	1.99842	1.41375	1.53146	1.49367	1.61552	1.67103	1.6114	1.60553	1.56673	1.63949	1.7949	1.73038	2.75401	2.34819	2.17988	1.86205	2.64085	1.67969	1.5004	1.52431	1.53611	1.64597	1.61311	1.65721	1.9378	1.42901	1.52334	1.54194	1.57323	2.4041	2.42946	2.01424	1.72683
θ	-0.237081	0.432311	0.206276	0.485892	-0.0942318	-0.215874	-0.434992	0.0296979	0.0419896	0.0774093	0.160658	0.279543	-0.285662	-0.365961	0.819535	0.961135	-0.356729	0.480103	-0.381653	-0.215435	0.0005553	-0.255355	-0.140821	-0.215991	-0.12282	-0.46282	-0.385945	-0.411654	-0.0498882	0.307957	0.145368	0.125836	0.27878	-0.203731	0.0665965	0.19895	0.226869	0.122341	-0.309694	-0.0449888	-0.268202	-0.344393	-0.360513	-0.237399	-0.402984	0.726221	0.550345	0.00607999	0.0455473
380h	1	2	3	4	5	6	7	8	9	10	11	12	13	14	15	16	17	18	19	20	21	22	23	24	25	26	27	28	29	30	31	32	33	34	35	36	37	38	39	40	41	42	43	44	45	46	47	48	49
Emaj	4.17261	7.24592	3.67146	4.82151	3.78761	15.3276	5.43396	6.86086	8.6614	6.76109	8.57516	10.2326	5.49055	12.4626	10.0076	5.84747	6.47605	8.07565	12.3647	12.9478	4.19886	7.37519	12.7778	10.1344	8.98524	6.89118	7.32619	7.67972	11.7928	10.4704	6.35358	11.294	13.9515	6.68801	4.80605	4.287	5.03724	5.77649	9.26913	6.29553	6.04382	14.023	12.9792	14.7598	8.90086	4.37776	6.83412	4.0145	4.13663
Emin	2.31089	1.91541	2.07958	2.90656	1.91799	2.32367	2.14446	2.06166	2.33252	2.26508	2.02646	1.80052	2.07829	2.23186	3.82584	3.55561	2.71192	1.69639	2.24713	2.10799	2.18324	2.20876	2.27595	2.39058	2.15062	2.24919	2.40968	2.16383	3.84422	3.49957	2.57837	2.73347	4.28113	1.95782	1.76965	1.59529	1.67587	1.83982	2.69154	2.46271	3.00909	2.24922	2.69359	2.36724	2.52088	1.67696	1.83726	2.08386	1.91078
θ	-0.189077	0.496243	0.385476	0.719904	0.146131	-0.153203	-0.455482	0.1044	0.0578397	0.0288454	0.117445	0.272543	-0.164766	-0.33061	0.634448	0.525516	0.00950785	0.50459	-0.27805	-0.220569	-0.0569238	-0.25867	-0.136816	-0.19166	-0.156754	-0.406341	-0.437596	-0.410355	-0.0992565	0.426952	0.412091	0.211797	0.347736	-0.112605	0.0109071	0.136184	0.0797723	0.0228808	-0.389471	-0.021496	-0.246384	-0.319929	-0.247805	-0.26187	-0.196592	0.917659	0.894242	-0.101008	-0.119001
380h	1	2	3	4	5	6	7	8	9	10	11	12	13	14	15	16	17	18	19	20	21	22	23	24	25	26	27	28	29	30	31	32	33	34	35	36	37	38	39	40	41	42	43	44	45	46	47	48	49
Emaj	4.17261	3.98256	3.79997	12.3554	5.43396	6.86086	8.6614	6.80785	4.63509	6.92093	10.0076	5.84747	8.37073	8.24204	4.05507	7.36658	11.1516	4.61187	7.27596	10.3319	8.55386	5.1021	6.35358	11.294	12.346	6.68801	4.80605	8.55028	4.16957	5.03724	5.77649	6.29912	5.38334	4.8891	7.82885	13.8238	3.76774	3.83311	3.91466	4.27706	6.83412	8.33828	4.59016	7.18236	4.0145	4.13663	3.89806	6.23487	3.98902
Emin	2.31089	2.65198	1.91364	2.30324	2.14446	2.06166	2.33252	2.27959	1.82982	2.16063	3.82584	3.55561	3.34653	2.03324	2.31307	2.23024	2.22302	1.97948	2.53435	2.24862	3.1497	2.74249	2.57837	2.73347	3.93591	1.95782	1.76965	1.81879	1.65257	1.67587	1.83982	2.29752	2.70315	2.13967	2.64897	2.37159	1.92485	2.07553	2.05282	1.4931	1.83726	1.65641	1.78259	1.85536	2.08386	1.91078	2.10594	2.15662	1.89474
θ	-0.189077	0.672814	0.151304	-0.185936	-0.455482	0.1044	0.0578397	0.0214433	-0.111781	-0.166522	0.634448	0.525516	-0.0507659	0.182595	0.0354515	-0.294643	-0.143355	-0.264452	-0.460108	-0.30315	-0.0991539	0.0240263	0.412091	0.211797	0.377676	-0.112605	0.0109071	0.221768	0.129675	0.0797723	0.0228808	-0.199312	-0.117066	-0.0970716	-0.400786	-0.291077	0.137526	0.318631	0.492143	1.04124	0.894242	0.556299	0.78037	0.553735	-0.101008	-0.119001	-0.234437	0.139988	0.1242
340h	1	2	3	4	5	6	7	8	9	10	11	12	13	14	15	16	17	18	19	20	21	22	23	24	25	26	27	28	29	30	31	32	33	34	35	36	37	38	39	40	41	42	43	44	45	46	47	48	49
Emaj	10.327	7.62324	11.6196	58.7503	12.5798	17.1213	16.392	18.4507	15.873	11.1359	15.384	8.43234	13.6745	17.7139	8.44349	21.0981	41.7547	11.513	16.0397	23.2636	10.1996	10.3082	10.9458	16.747	19.0212	23.1976	18.8367	19.8297	18.9718	16.5597	22.1568	15.4895	11.6806	11.3804	17.173	43.8903	6.42526	10.2729	6.55527	6.94552	9.44077	18.3918	8.46355	11.2704	10.2323	10.8537	7.05539	15.5038	11.9994
Emin	3.47431	3.78389	2.45884	4.56435	3.48543	3.14012	3.53176	3.74705	3.75996	3.18729	5.87622	4.26839	3.7928	3.44396	3.40734	3.17209	4.47164	2.76382	4.64018	3.73774	3.75294	4.34406	3.67406	4.07621	5.66505	3.23677	3.11096	3.02084	2.86821	2.67543	3.81757	3.86381	3.81356	4.18424	4.42195	4.11894	2.47058	3.34284	3.41053	2.07551	2.57197	3.52829	2.32725	2.60124	3.5172	2.86948	2.6379	3.03256	2.48923
θ	-0.209211	0.604581	0.0389487	-0.212997	-0.384308	0.0475571	-0.0319432	0.026721	-0.0833408	0.0303098	0.544618	0.598261	0.224326	0.181838	0.118577	-0.341268	-0.179116	-0.266321	-0.48492	-0.353269	-0.0714882	-0.0750621	0.320659	0.121022	0.282858	-0.116431	-0.0152489	0.232408	0.115875	0.0643324	0.0785275	-0.209023	-0.0556549	-0.0466196	-0.348115	-0.275264	0.21546	0.274912	0.394743	0.963218	0.874058	0.598854	0.762877	0.452724	-0.0823848	-0.0922241	-0.200463	0.0162566	0.0166546
340h	1	2	3	4	5	6	7	8	9	10	11	12	13
Emaj	8.42575	11.4053	30.983	10.6585	12.4009	14.2598	18.012	16.6233	7.55807	13.7587	15.9261	13.8891	11.9658
Emin	3.04757	2.6356	4.10056	2.82876	4.80156	4.74301	3.45952	3.60584	3.83961	3.39063	3.40896	3.53131	2.69392
θ	0.138433	0.05539	-0.279583	0.629292	-0.316256	0.30485	0.0174806	0.0759398	0.566094	0.425681	-0.174679	-0.000915383	0.0178684
300h	1	2	3	4	5	6	7	8	9	10	11	12	13
Emaj	10.1446	29.9343	54.832	31.206	14.4745	30.1744	60.0852	27.0326	16.0332	48.4866	30.4619	44.4527	46.5718
Emin	4.94433	4.55495	6.31371	8.86397	5.36814	8.05946	5.72193	7.05505	6.0724	8.0279	5.32663	5.30745	4.19562
θ	0.67269	0.127457	-0.14992	0.825229	-0.337615	0.314785	0.0828367	0.302056	0.437951	0.437034	-0.139575	-0.00409497	0.056924
[truncated: 9 more columns]
